# Supplementary material for: Brief Communication: An Electrifying Atmospheric River: Understanding the Thunderstorm Event in Santa Barbara County during March 2019
Source: Copernicus journal article supplement (doi:10.5194/nhess-2019-342), 2019-11-27
Supplement: Supplementary file 1 [file nhess-2019-342-supplement.pdf]

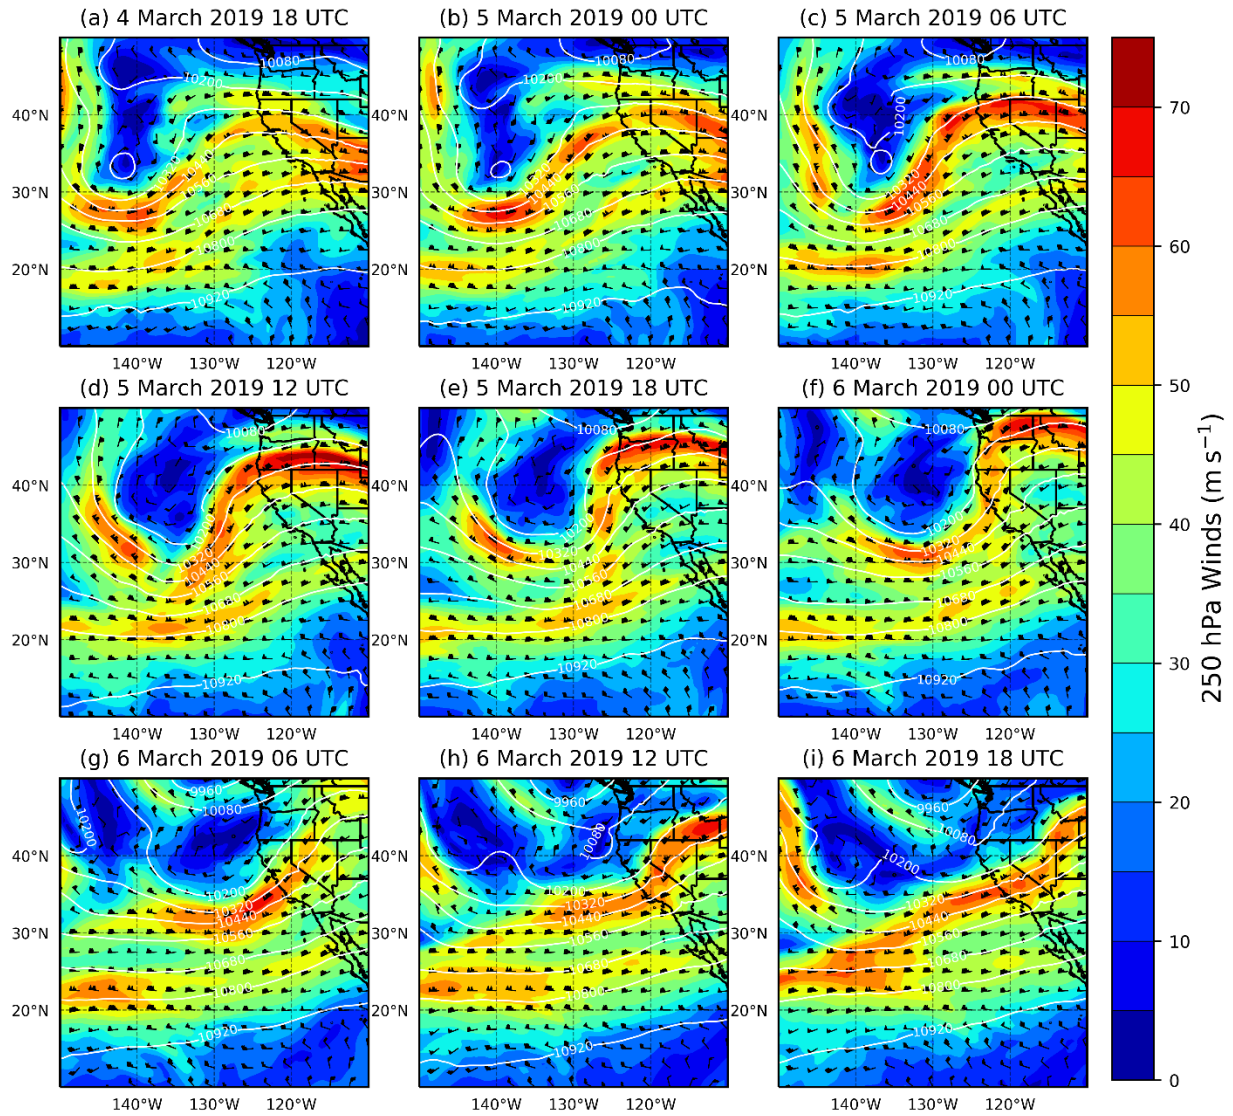

**Figure S1.** CFSv2 250 hPa winds (barbs, knots), 250 hPa wind magnitude (shaded; m s<sup>-1</sup>) and 250 hPa geopotential height (white contours; m) at 6-hourly timesteps between 4 March 2019 18 UTC and 6 March 2019 18 UTC.

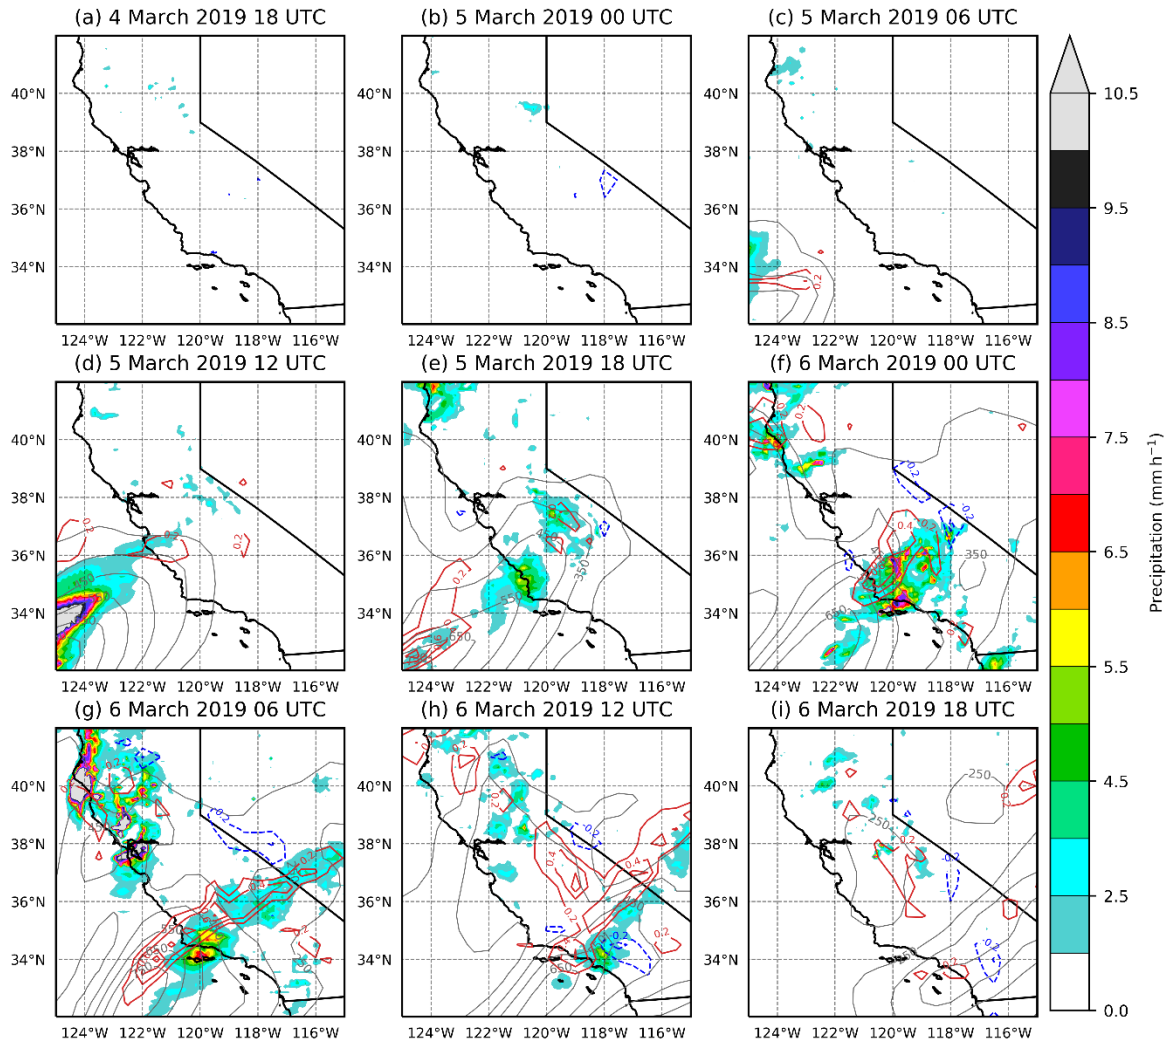

**Figure S2.** CFSv2 vertical velocity (red and blue contours,  $\text{m s}^{-1}$ ), GPM averaged precipitation rate (shaded;  $\text{mm h}^{-1}$ ), and IVT greater than  $250 \text{ kg m}^{-1} \text{ s}^{-1}$  (grey contours; every  $100 \text{ kg m}^{-1} \text{ s}^{-1}$ ) at 6-hourly timesteps between 4 March 2019 18 UTC and 6 March 2019 18 UTC.

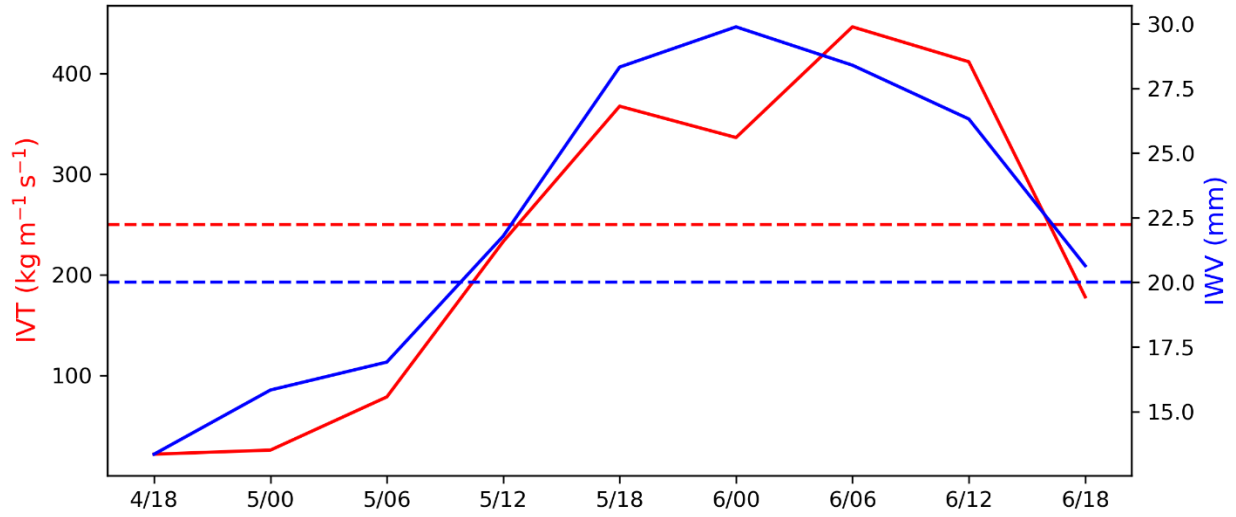

**Figure S3.** CFSv2 IVT (red line;  $\text{kg m}^{-1} \text{s}^{-1}$ ) and IWV (blue line; mm) at the grid cell closest to Santa Barbara ( $34.5^\circ\text{N}$ ,  $119.5^\circ\text{W}$ ) at each 6-hour time step between 4 March 2019 18 UTC and 6 March 2019 18 UTC. The minimum thresholds for the location to be considered part of an AR event are indicated by the dotted lines.

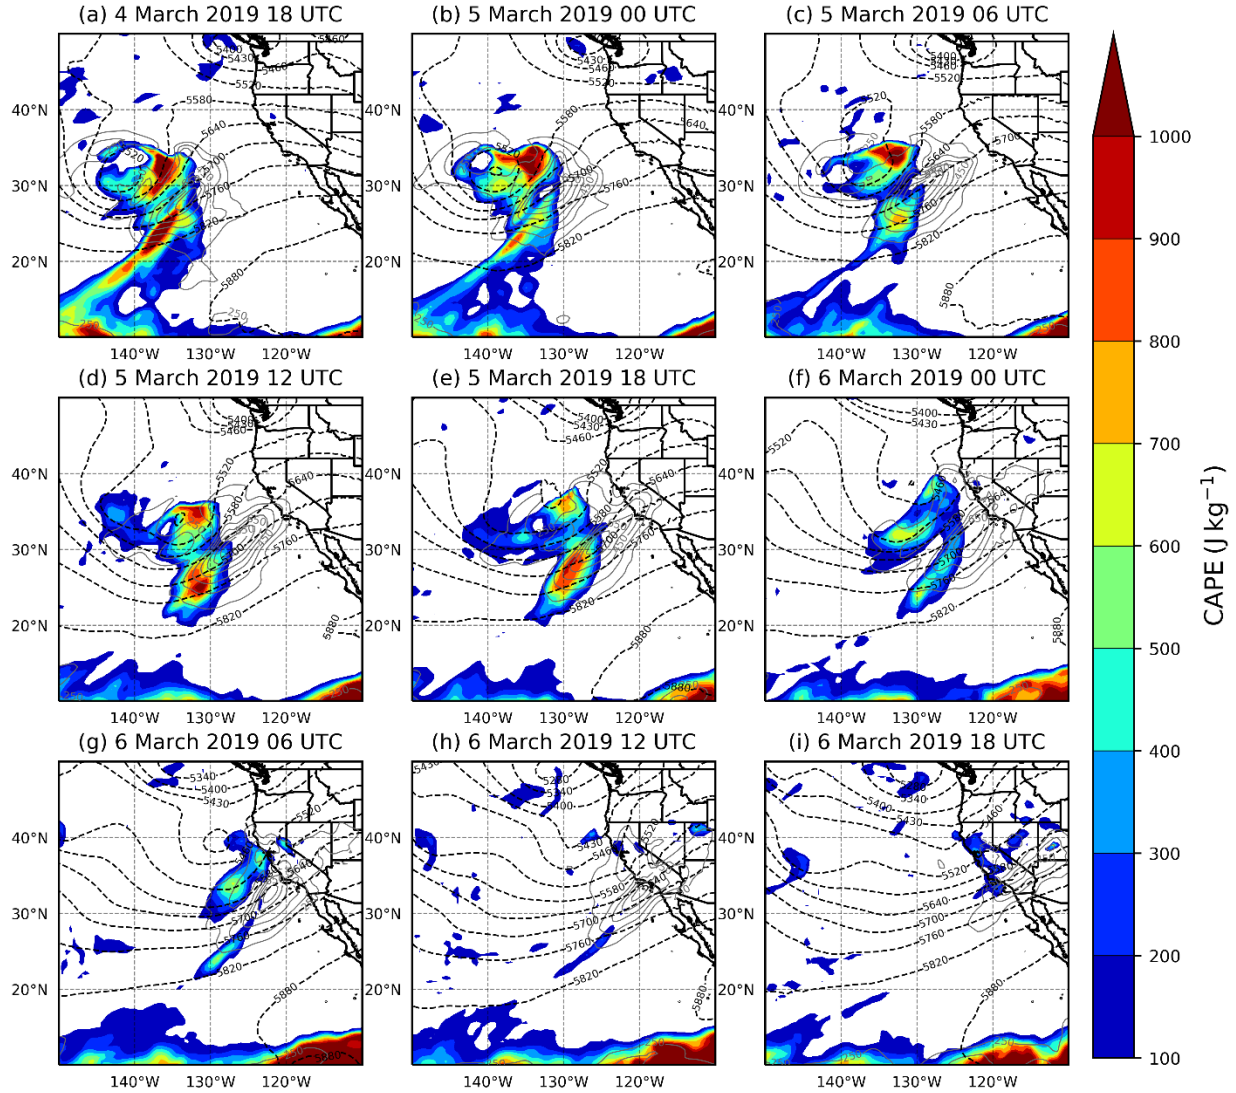

**Figure S4.** CFSv2 CAPE (shaded, J kg<sup>-1</sup>), IVT greater than 250 kg m<sup>-1</sup> s<sup>-1</sup> (grey contours; every 100 kg m<sup>-1</sup> s<sup>-1</sup>), and 500 hPa geopotential height (black dashed contours; m) for each 6-hour time step between 4 March 2019 18 UTC and 6 March 2019 18 UTC.



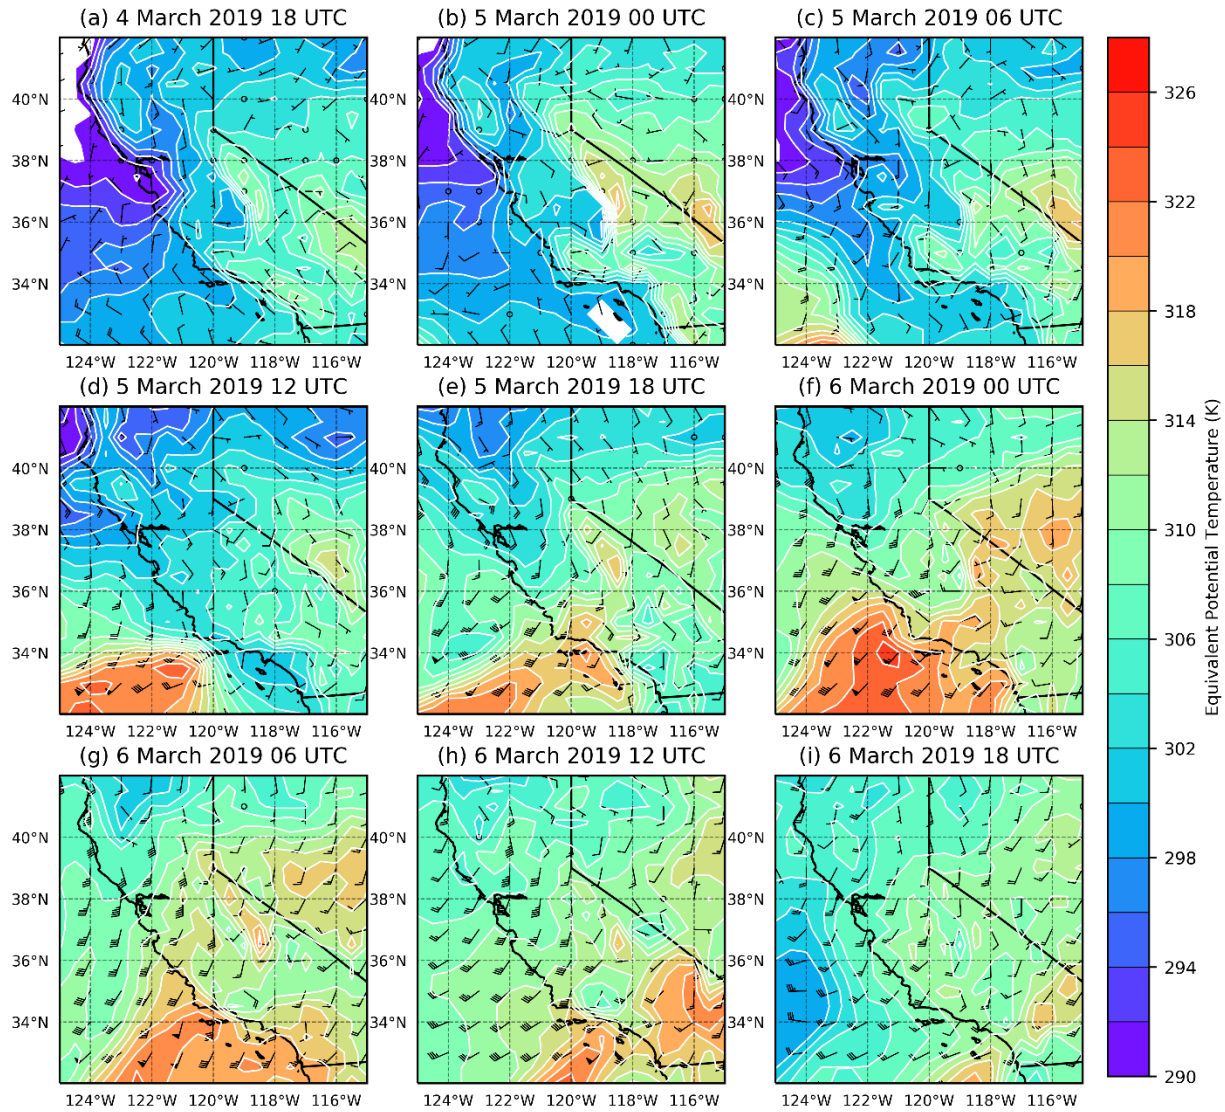

**Figure S5.** CFSv2 850 hPa Equivalent Potential Temperature (shaded and white contours to emphasize regions with strong gradients; K), and 850 hPa winds (barbs; knots) for each 6-hour time step between 4 March 2019 18 UTC and 6 March 2019 18 UTC.

GOES-17 ABI L2+ Cloud and Moisture Imagery brightness temperature (Band 13, 10.33um) on 2019-03-06T04:24:57.3Z

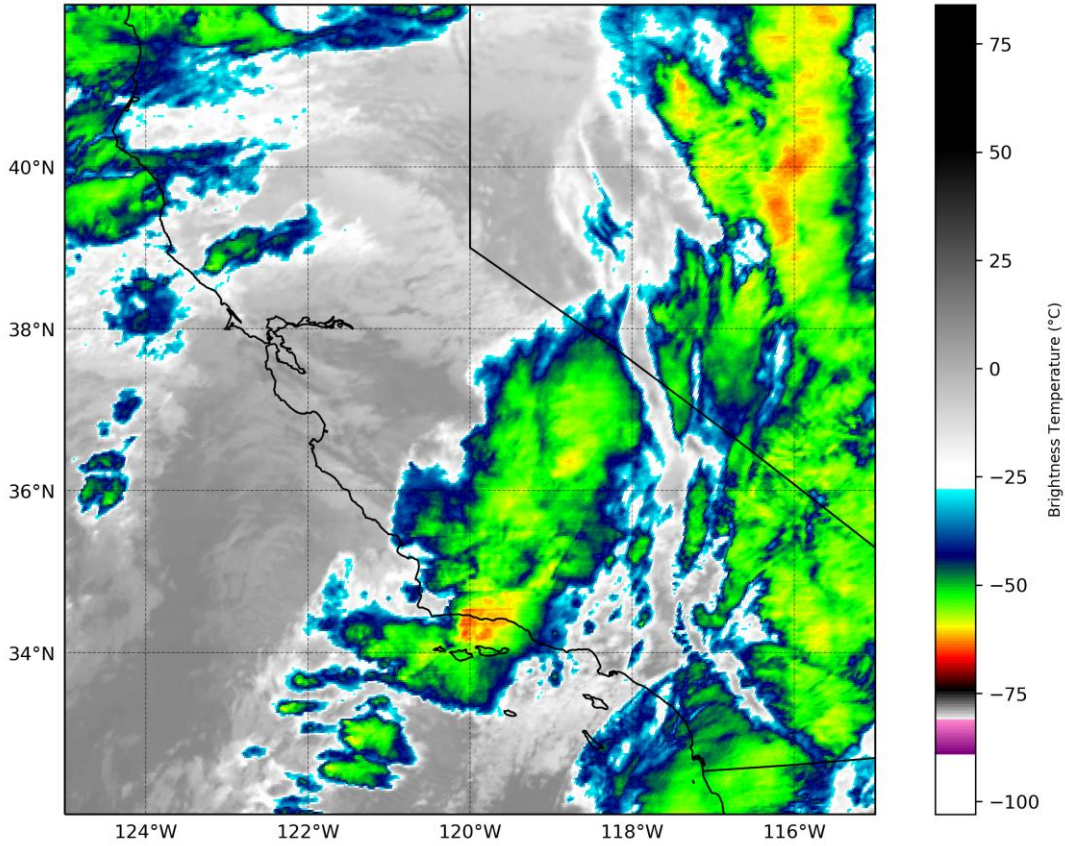

**Figure S6.** Infrared brightness temperatures (shaded, °C) derived from band 13 of the GOES17 ABI L2 Cloud and Moisture Imagery Brightness Temperature at 6 March 2019 4:24 UTC.

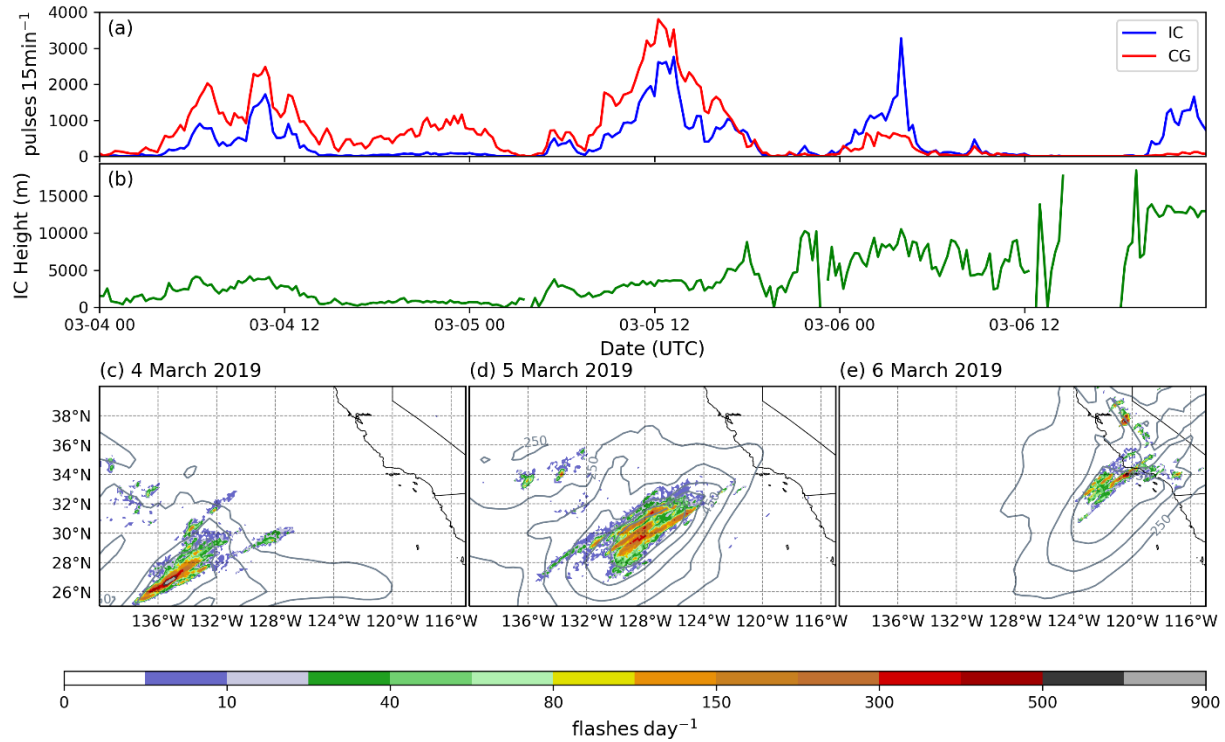

**Figure S7.** (a) ENGLN number of flashes per 15 minutes between 4 March 2019 00 UTC and 7 March 00 UTC for in-cloud (IC) flashes (blue line) and cloud-to-ground (CG) flashes (red line). (b) ENGLN average IC lightning flash height (green line; m) between 4 March 2019 00 UTC and 7 March 00 UTC. (c) ENGLN lightning flash count (shaded, flashes day<sup>-1</sup>) interpolated to 0.1° and IVT greater than 250 kg m<sup>-1</sup> s<sup>-1</sup> (grey contours; every 100 kg m<sup>-1</sup> s<sup>-1</sup>) for the 24-hour period of 4 March 2019. (d) Same as (c), but for the 24-hour period of 5 March 2019. (e) Same as (c), but for the 24-hour period of 6 March 2019.

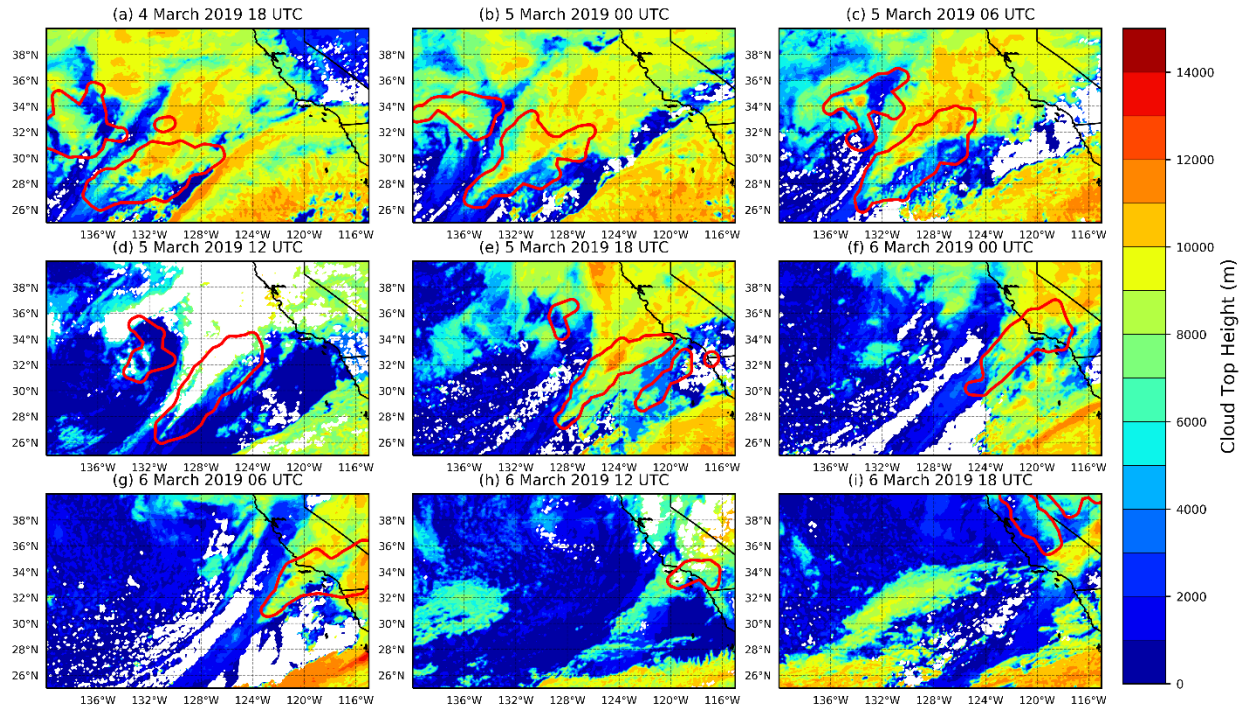

**Figure S8.** GOES ABI L2 ACHC cloud top height (shaded; m) and the location of the majority of lightning flash points (red polygon) at each 6-hour time step between 4 March 2019 18 UTC and 6 March 2019 18 UTC.



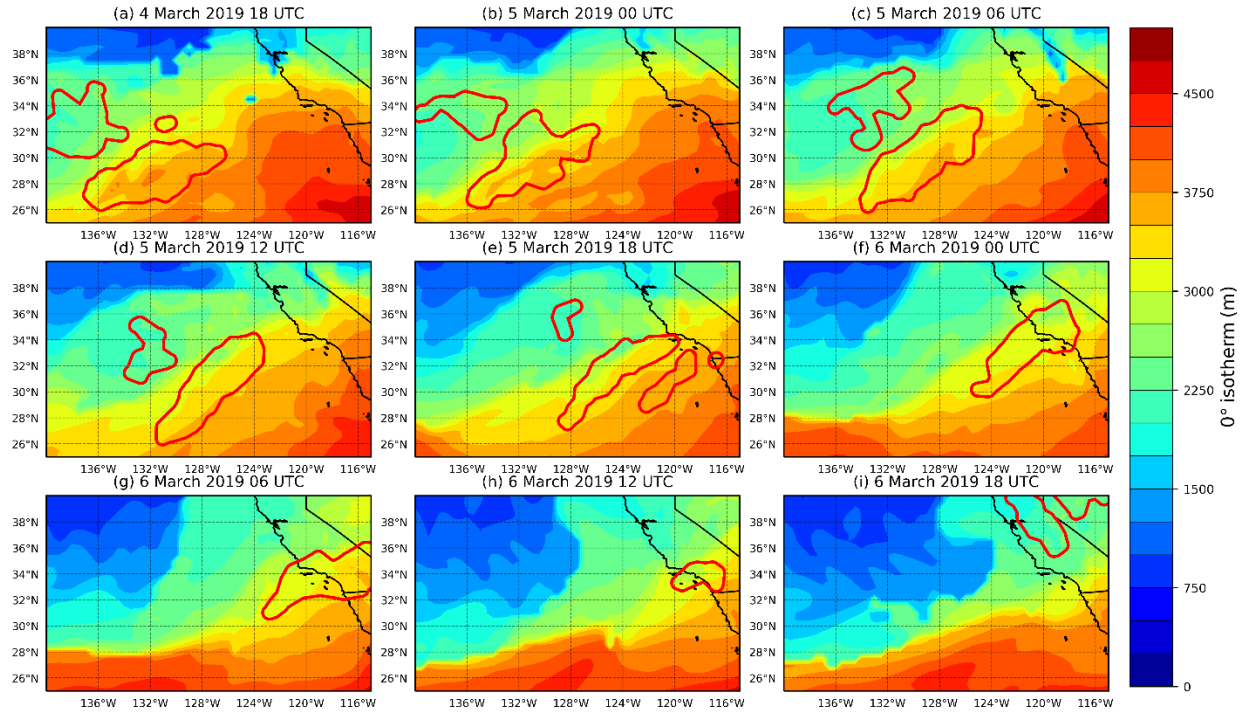

**Figure S9.** CFSv2 height of 0° isotherm (shaded; m) and the location of the majority of lightning flash points (red polygon) at each 6-hour time step between 4 March 2019 18 UTC and 6 March 2019 18 UTC.
